# Supplementary material
Source: PubMed Central journal article supplement (PMC10617554)
Supplement: aem.00453-23-s0001.pdf [file aem.00453-23-s0001.pdf]

1 **SUPPLEMENTARY MATERIALS**

2 **Table S1. List of experimentally and non-experimentally demonstrated NIS synthetases**  
 3 **used for the construction of the phylogenetic Neighbor-Joining Tree.** Accession numbers  
 4 and organisms in which the function of the NIS synthetases was demonstrated are displayed in  
 5 the table. The letters used to identify the NIS type refer to the substrates: A, citric acid; B,  $\alpha$ -  
 6 ketoglutarate intermediates; and C, citryl or succinyl-based intermediates.

7

| Accession number | Gene ID     | Organism                           | Experimentally demonstrated* | NIS type | Siderophore       |
|------------------|-------------|------------------------------------|------------------------------|----------|-------------------|
| AAAY37628.1      | <i>acsA</i> | <i>Pseudomonas syringae</i> B728a  | Yes                          | B        | Achromobactin     |
| AAAY37626.1      | <i>acsC</i> | <i>Pseudomonas syringae</i> B728a  | Yes                          | C        | Achromobactin     |
| AAAY37623.1      | <i>acsD</i> | <i>Pseudomonas syringae</i> B728a  | Yes                          | A        | Achromobactin     |
| QHI23110.1       | <i>acbA</i> | <i>Acinetobacter haemolyticus</i>  | Yes                          | A        | Acinetoferrin     |
| QHI23108.1       | <i>acbC</i> | <i>Acinetobacter haemolyticus</i>  | Yes                          | C        | Acinetoferrin     |
| UIM78503.1       | <i>iucA</i> | <i>Escherichia coli</i> O2H1       | Yes                          | A        | Aerobactin        |
| UIM78504.1       | <i>iucC</i> | <i>Escherichia coli</i> O2H1       | Yes                          | C'       | Aerobactin        |
| WP_059270381.1   | <i>alcC</i> | <i>Achromobacter denitrificans</i> | Yes                          | C'       | Alcalign          |
| QTE80720.1       | <i>avbD</i> | <i>Shewanella algae</i>            | Yes                          | B        | Avaroferrin       |
| QFI42889.1       | <i>desD</i> | <i>Streptomyces coelicolor</i> A3  | Yes                          | C'       | Desferroxiamine D |
| WP_011213627.1   | <i>lbtA</i> | <i>Legionella pneumophila</i>      | Yes                          | A'       | Legiobactin       |
| WP_000679659.1   | <i>asbA</i> | <i>Bacillus anthracis</i>          | Yes                          | A        | Petrobactin       |
| WP_011053144.1   | <i>asbB</i> | <i>Bacillus anthracis</i>          | Yes                          | C        | Petrobactin       |

|                |             |                                           |            |    |                     |
|----------------|-------------|-------------------------------------------|------------|----|---------------------|
| AVV86182.1     | <i>pubC</i> | <i>Shewanella putrefaciens</i>            | Yes        | C' | Putrebactin         |
| AAK65918.1     | <i>rhbC</i> | <i>Ensifer meliloti</i><br>1021           | Yes        | C  | Rhizobactin         |
| AAK65921.1     | <i>rhbF</i> | <i>Ensifer meliloti</i><br>1021           | Yes        | A  | Rhizobactin         |
| WP_082163293.1 | <i>rhiE</i> | <i>Caballeronia mineralivorans</i>        | This study |    | Rhizobactin         |
| WP_041915341.1 | -           | <i>Ensifer meliloti</i><br>DM4            | No         |    | Rhizobactin         |
| WP_191487624.1 | -           | <i>Pseudomonas</i><br>FEN                 | No         |    | Rhizobactin B       |
| ABE27278.1     | <i>fslA</i> | <i>Francisella tularensis</i>             | Yes        | A' | Rhizoferrin         |
| QWF25631.1     | <i>sfab</i> | <i>Staphylococcus aureus</i> RN4220       | Yes        | A' | Staphyloferrin<br>A |
| QWF25633.1     | <i>sfad</i> | <i>Staphylococcus aureus</i> RN4220       | Yes        | A' | Staphyloferrin<br>A |
| BAC63002.1     | <i>sbnC</i> | <i>Staphylococcus aureus</i> RN4220       | Yes        | B  | Staphyloferrin B    |
| QWF26222.1     | <i>sbnE</i> | <i>Staphylococcus aureus</i> RN4220       | Yes        | A  | Staphyloferrin B    |
| QWF26223.1     | <i>sbnF</i> | <i>Staphylococcus aureus</i> RN4220       | Yes        | C  | Staphyloferrin B    |
| BAC63002.1     | <i>pvsB</i> | <i>Vibrio parahaemolyticus</i><br>2210633 | Yes        | B  | Vibrioferrin        |
| BAC63004.1     | <i>pvsD</i> | <i>Vibrio parahaemolyticus</i><br>2210633 | Yes        | A  | Vibrioferrin        |
| BAC63002.1     | <i>pvsB</i> | <i>Vibrio parahaemolyticus</i><br>2210633 | Yes        | B  | Vibrioferrin        |

|            |             |                                                     |     |   |             |
|------------|-------------|-----------------------------------------------------|-----|---|-------------|
| BAC63004.1 | <i>pvsD</i> | <i>Vibrio</i><br><i>parahaemolyticus</i><br>2210633 | Yes | A | Vibrioferin |
|------------|-------------|-----------------------------------------------------|-----|---|-------------|

8 \* Evidence of production and chemical characterization of the siderophore.

9  
10  
11  
12  
13  
14  
15  
16  
17  
18  
19  
20  
21  
22  
23  
24  
25  
26  
27  
28  
29  
30  
31

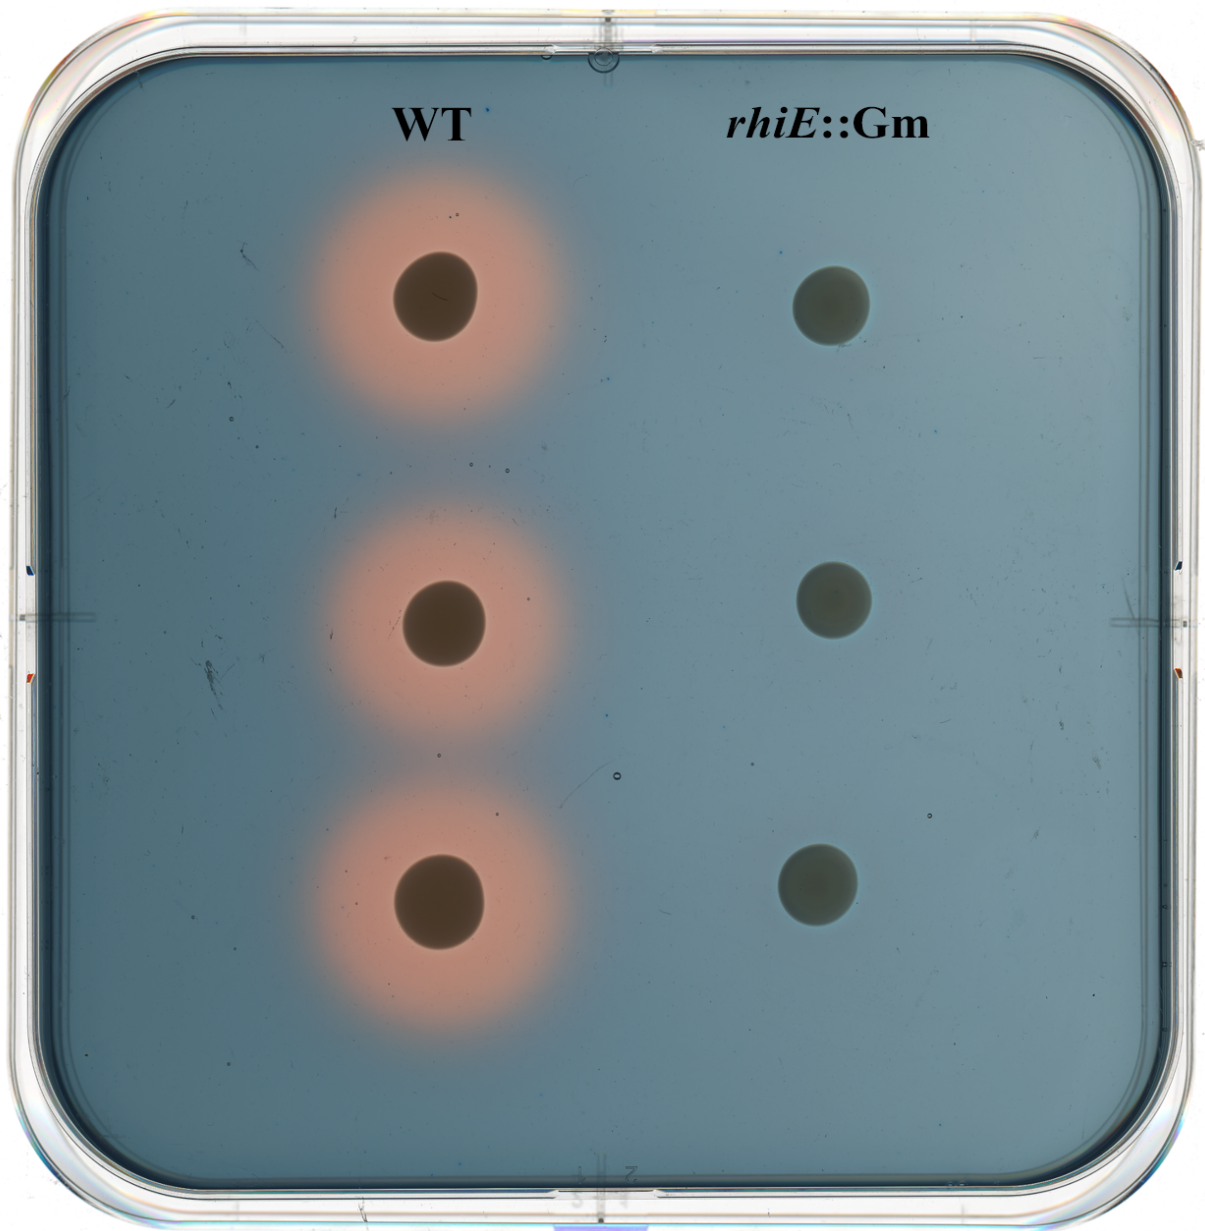

33

34

35 **Figure S1.** *Caballeronia mineralivorans* PML1(12) WT (top) and its *rhiE::Gm* mutant

36 (bottom) were incubated for 3 days at 25 °C on CAS solid medium. The presence of a

37 siderophore activity is determined by the production of yellow halo around the colony.

38

39

40

41

42

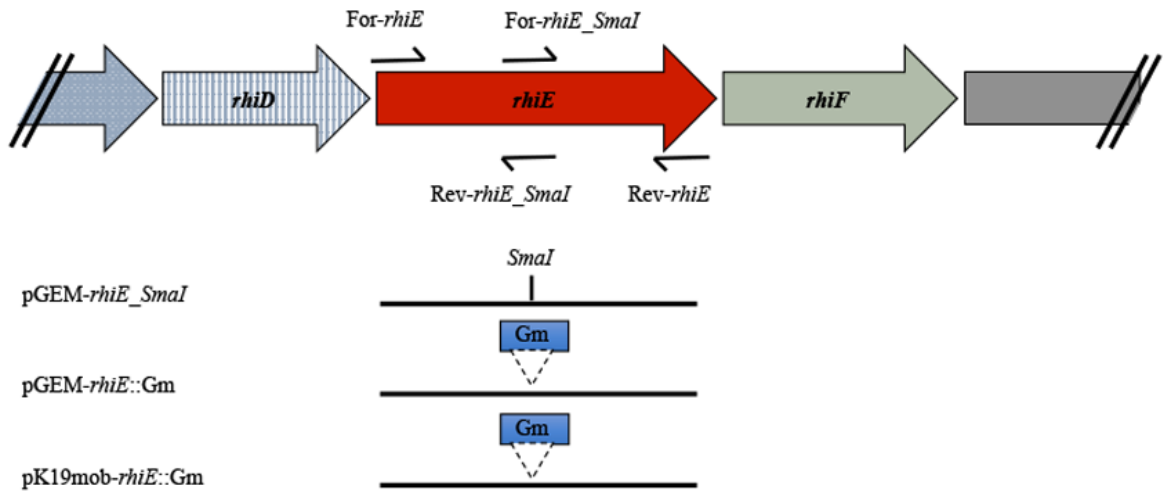

43

44

45 **Figure S2. Scheme of the gene region and plasmids used to construct *rhiE::Gm* mutant.**

46 Broken arrows symbolize the primers used for subcloning. Restriction sites used for subcloning

47 are shown. See Table 2 for a complete description of the plasmids and primers used.

48
